# Supplementary material for: Adaptive Immune Response Signaling Is Suppressed in Ly6Chigh Monocyte but Upregulated in Monocyte Subsets of ApoE -/- Mice — Functional Implication in Atherosclerosis
Source: PubMed Central journal article supplement (PMC8721109; doi:10.3389/fimmu.2021.809208), 2021-12-20
Supplement: DataSheet_2.pdf [file DataSheet_2.pdf]

# **Adaptive immune response signaling is suppressed in Ly6C<sup>high</sup> monocyte but upregulated in monocyte subsets of *ApoE*<sup>-/-</sup> mice — functional implication in atherosclerosis**

Pingping Yang<sup>1,2#</sup>, Qinghua Wu<sup>1#</sup>, Lizhe Sun<sup>2,3</sup>, Pu Fang<sup>2</sup>, Lu Liu<sup>2</sup>, Yong Ji<sup>4</sup>, Joon-Young Park, Xuebin Qin<sup>5</sup>, Xiaofeng Yang<sup>2</sup>, Hong Wang<sup>2\*</sup>

<sup>1</sup>Departments of Cardiovascular Medicine and Endocrinology, the Second Affiliated Hospital of Nanchang University, Nanchang, Jiangxi, 330006, People's Republic of China

<sup>2</sup>Center for Metabolic Disease Research, Department of Cardiovascular science, Lewis Kats School of Medicine, Temple University, Philadelphia, PA, USA

<sup>3</sup>Department of Cardiovascular Medicine, the First Affiliated Hospital of Xi'an Jiaotong University, Xi'an 710061, People's Republic of China

<sup>4</sup>Key Laboratory of Cardiovascular Disease and Molecular Intervention, Nanjing Medical University, Nanjing, People's Republic of China

<sup>5</sup>Tulane National Primate Research Center, School of Medicine, Tulane University, Covington, LA, USA

#Yang P and Wu Q contributed equally to this work

\*Correspondence should to Professor Hong Wang (Ph.D. & M.D.); Center for Metabolic Disease Research, Lewis Kats School of Medicine, Medical Education and Research Building, Room 1060, 3500 N Broad St, Philadelphia, PA 19140 USA; E-mail: hong.wang@temple.edu

**A. Gating and sorting strategy to isolate Ly6C<sup>high</sup> and Ly6C<sup>low</sup> MC in CT and *ApoE*<sup>-/-</sup> mice**

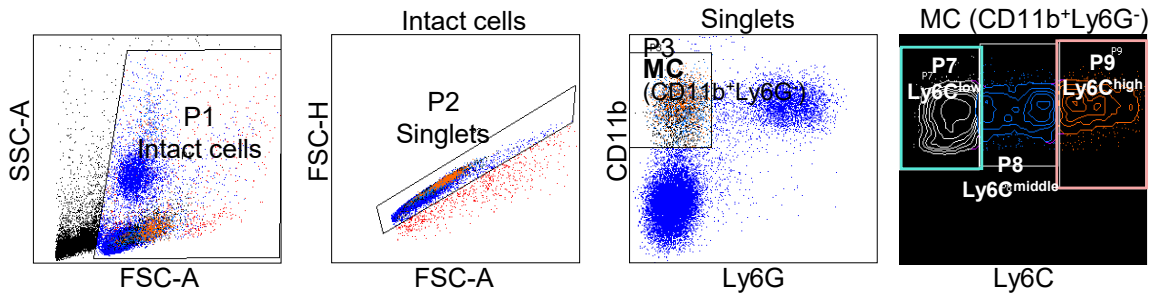

Tube: *ApoE*<sup>-/-</sup> RAN 2.3e6 TOAL CELLS; SORTED 100,000 P3; P7 P8; P9

| Population | #Events | %Parent | %Total |
|------------|---------|---------|--------|
| All Events | 30,000  | ####    | 100.0  |
| P1         | 20,449  | 68.2    | 68.2   |
| P2         | 19,808  | 96.9    | 66.0   |
| P3         | 4,066   | 20.5    | 13.6   |
| P7         | 1,312   | 32.3    | 4.4    |
| P8         | 964     | 23.7    | 3.2    |
| P9         | 1,776   | 43.7    | 5.9    |

Tube: CT RAN 3.6e6 TOAL CELLS; SORTED 100,000 P3; P7 P8; P9

| Population | #Events | %Parent | %Total |
|------------|---------|---------|--------|
| All Events | 30,000  | ####    | 100.0  |
| P1         | 21,827  | 72.8    | 72.8   |
| P2         | 21,314  | 97.6    | 71.0   |
| P3         | 3,315   | 15.6    | 11.0   |
| P7         | 1,193   | 36.0    | 4.0    |
| P8         | 1,098   | 33.1    | 3.7    |
| P9         | 1,006   | 30.3    | 3.4    |

**B. MC subset cell yield from peripheral blood by cell sorting**

| P# Cell subset (%)                                                  | <i>ApoE</i> <sup>-/-</sup> (%) | CT (%)         |
|---------------------------------------------------------------------|--------------------------------|----------------|
| P3 MC (MC/live cell %)                                              | 100,000 (19.8)                 | 100,000 (15.5) |
| P7 Ly6C <sup>low</sup> MC (Ly6C <sup>low</sup> MC/total MC%)        | 32,300 (32.3)                  | 36,000 (36.0)  |
| P8 Ly6C <sup>middle</sup> MC (Ly6C <sup>middle</sup> MC/total MC %) | 23,700 (23.7)                  | 33,100 (33.1)  |
| P9 Ly6C <sup>high</sup> MC (Ly6C <sup>high</sup> MC/MC %)           | 43,700 (43.7)                  | 30,300 (30.3)  |

**Supplementary figure 1. A. Gating and sorting strategy to isolate Ly6C<sup>high</sup> and Ly6C<sup>low</sup> MC in CT and *ApoE*<sup>-/-</sup> mice.** Mouse white blood cell were prepared from peripheral blood and stained with antibody against CD11b, Ly6G and Ly6C and subjected for flow cytometry cell sorting. Intact cells (P1, 68.2% in *ApoE*<sup>-/-</sup>, 72.8% in CT) were recognized based on higher FSC-A (larger size). Singlets (P2, 66.0% in *ApoE*<sup>-/-</sup>, 71.0% in CT) were identified by using FSC-H versus FSC-A appeared on a diagonal. CD11b<sup>+</sup>Ly6G<sup>-</sup> cells (P3, 13.6% in *ApoE*<sup>-/-</sup>, 11.0% in CT) were selected as MC. MC subsets (P9 CD11b<sup>+</sup>Ly6G<sup>-</sup>Ly6C<sup>high</sup>, and P7 CD11b<sup>+</sup>Ly6G<sup>-</sup>Ly6C<sup>low</sup>) were sorted based on Ly6C levels. The quantification of MC was used flow cytometry analysis for Ly6C<sup>high</sup> and Ly6C<sup>low</sup> MC in CT and *ApoE*<sup>-/-</sup>. **B. MC subset cell yield from peripheral blood by cell sorting.** Flow cytometry sorted 100,000 MC with 43,700 Ly6C<sup>high</sup> and 32,300 Ly6C<sup>low</sup> MC in *ApoE*<sup>-/-</sup> mice and 30,300 Ly6C<sup>high</sup> and 36,000 Ly6C<sup>low</sup> MC in CT mice.

# Supplementary table 1A. Ly6C<sup>high</sup>(CT) vs Ly6C<sup>low</sup>(CT)

## a. Top 20 canonical pathway by top-down analysis (GSEA, |NES|>1)

| Pathway name                                                         | NES          | NOM p-val   | FDR q-val   |
|----------------------------------------------------------------------|--------------|-------------|-------------|
| <b>Interferon α/β signaling</b>                                      | <b>2.25</b>  | <b>0.00</b> | <b>0.01</b> |
| Oxidative phosphorylation                                            | 1.92         | 0.00        | 0.28        |
| IL3 pathway                                                          | 1.85         | 0.02        | 0.40        |
| Insulin receptor recycling                                           | 1.84         | 0.00        | 0.32        |
| Alk1 pathway                                                         | 1.79         | 0.00        | 0.43        |
| Perk regulates gene expression                                       | 1.76         | 0.00        | 0.44        |
| ATF4 activates genes in response to endoplasmic reticulum stress     | 1.75         | 0.01        | 0.42        |
| Parkinsons disease                                                   | 1.74         | 0.00        | 0.38        |
| LDL clearance                                                        | 1.70         | 0.02        | 0.47        |
| Macroautophagy                                                       | 1.68         | 0.00        | 0.51        |
| Autophagy                                                            | 1.68         | 0.00        | 0.46        |
| Detoxification of reactive oxygen species                            | 1.68         | 0.01        | 0.44        |
| Huntingtons disease                                                  | 1.65         | 0.00        | 0.48        |
| Antigen processing cross presentation                                | 1.63         | 0.00        | 0.51        |
| HDMS demethylate histones                                            | 1.63         | 0.02        | 0.50        |
| Beta catenin phosphorylation cascade                                 | 1.62         | 0.05        | 0.48        |
| Regulation of runx3 expression and activity                          | 1.62         | 0.00        | 0.45        |
| Signaling by bmp                                                     | 1.60         | 0.03        | 0.49        |
| Cholesterol biosynthesis                                             | 1.60         | 0.02        | 0.49        |
| Gmcsf pathway                                                        | 1.59         | 0.01        | 0.50        |
| <b>Antigen activates BCR leading to generation of 2nd messengers</b> | <b>-1.79</b> | <b>0.00</b> | <b>0.01</b> |
| <b>Gap junction assembly</b>                                         | <b>-1.72</b> | <b>0.00</b> | <b>0.05</b> |
| <b>Gap junction trafficking and regulation</b>                       | <b>-1.66</b> | <b>0.00</b> | <b>0.14</b> |
| <b>Ncam1 interactions</b>                                            | <b>-1.65</b> | <b>0.00</b> | <b>0.15</b> |
| <b>Carboxyterminal post translational modifications of tubulin</b>   | <b>-1.64</b> | <b>0.00</b> | <b>0.15</b> |
| <b>Phase 0 rapid depolarisation</b>                                  | <b>-1.62</b> | <b>0.01</b> | <b>0.19</b> |
| <b>IAT2 NTAL lab on calcium mobilization</b>                         | <b>-1.60</b> | <b>0.00</b> | <b>0.24</b> |
| Potassium channels                                                   | -1.59        | 0.00        | 0.26        |
| Primary immunodeficiency                                             | -1.58        | 0.01        | 0.30        |
| Nkt pathway                                                          | -1.54        | 0.02        | 0.50        |
| Interleukin 37 signaling                                             | -1.53        | 0.02        | 0.53        |
| IL12 2paway                                                          | -1.53        | 0.01        | 0.52        |
| Complement cascade                                                   | -1.53        | 0.02        | 0.49        |
| Ncam signaling for neurite out growth                                | -1.52        | 0.01        | 0.47        |
| IL12 stat4 pathway                                                   | -1.52        | 0.01        | 0.45        |
| Carm er pathway                                                      | -1.51        | 0.03        | 0.51        |
| Csk pathway                                                          | -1.51        | 0.02        | 0.49        |
| Tob1 pathway                                                         | -1.51        | 0.02        | 0.47        |
| Striated muscle contraction                                          | -1.49        | 0.02        | 0.57        |
| Il12 pathway                                                         | -1.48        | 0.03        | 0.63        |

Up-regulated Down-regulated

## b. Representative SDE genes of top 20 canonical pathways by top-down analysis (GSEA, |LogFC|>1, adj. P<0.01)

| Up-regulated (40 genes)   |       |       |          |       |       |
|---------------------------|-------|-------|----------|-------|-------|
| Gene                      | logFC | adj.P | Gene     | logFC | adj.P |
| Plcb1                     | 5.21  | 0.00  | Atf3     | 2.51  | 0.00  |
| Ccl2                      | 4.36  | 0.00  | Ifitm3   | 2.48  | 0.00  |
| Mx2                       | 3.44  | 0.00  | Oas3     | 2.44  | 0.00  |
| Fos                       | 3.32  | 0.00  | Acvr1    | 2.38  | 0.00  |
| Ifit3                     | 3.27  | 0.00  | Isg15    | 2.34  | 0.00  |
| Id1                       | 3.21  | 0.00  | Soat1    | 2.31  | 0.00  |
| Mx1                       | 3.06  | 0.00  | Ap2a2    | 2.11  | 0.00  |
| Cox6b2                    | 3.00  | 0.00  | Mvd      | 2.05  | 0.00  |
| Irf7                      | 2.86  | 0.00  | Lsr      | 2.02  | 0.00  |
| Npc2                      | 2.84  | 0.00  | Lamtor4  | 2.01  | 0.00  |
| Acvr1                     | 2.81  | 0.00  | Atg9b    | 1.99  | 0.00  |
| Oas2                      | 2.73  | 0.00  | Eng      | 1.92  | 0.00  |
| Prdx5                     | 2.67  | 0.00  | Cd14     | 1.92  | 0.00  |
| Ctsl                      | 2.60  | 0.00  | Bst2     | 1.89  | 0.00  |
| Ifit2                     | 2.60  | 0.00  | Usp18    | 1.89  | 0.00  |
| Gpx3                      | 2.59  | 0.00  | Atp6v1b2 | 1.88  | 0.00  |
| Exosc6                    | 2.59  | 0.00  | Frat2    | 1.86  | 0.00  |
| Ifit1                     | 2.59  | 0.00  | Samhd1   | 1.82  | 0.00  |
| Xaf1                      | 2.54  | 0.00  | Ldlr     | 1.80  | 0.00  |
| Acvr2b                    | 2.53  | 0.00  | Stat2    | 1.80  | 0.00  |
| Down-regulated (40 genes) |       |       |          |       |       |
| Gene                      | logFC | adj.P | Gene     | logFC | adj.P |
| Ptpn14                    | -6.74 | 0.00  | Ttll7    | -4.02 | 0.00  |
| Blk                       | -5.88 | 0.00  | Kcng1    | -4.01 | 0.00  |
| Cacna1i                   | -5.71 | 0.00  | Ccr7     | -3.83 | 0.00  |
| Blnk                      | -5.62 | 0.00  | Ptpn13   | -3.77 | 0.00  |
| Cacna1s                   | -5.61 | 0.00  | Prf1     | -3.76 | 0.00  |
| Cd19                      | -5.60 | 0.00  | Ighg1    | -3.49 | 0.00  |
| Cd79a                     | -5.55 | 0.00  | Gzma     | -3.43 | 0.00  |
| Iglc2                     | -5.09 | 0.00  | Tbx21    | -3.40 | 0.00  |
| Ighd                      | -5.06 | 0.00  | Tubb3    | -3.35 | 0.00  |
| Cd55                      | -4.76 | 0.00  | Gnb3     | -3.33 | 0.00  |
| Cd79b                     | -4.67 | 0.00  | Ighv1-69 | -3.33 | 0.00  |
| Tnfrsf13c                 | -4.61 | 0.00  | Eomes    | -3.33 | 0.00  |
| Iglc3                     | -4.55 | 0.00  | Ccl4     | -3.20 | 0.00  |
| Agbl3                     | -4.52 | 0.00  | Aicda    | -3.08 | 0.00  |
| Tnnt1                     | -4.48 | 0.00  | Il18r1   | -3.06 | 0.00  |
| Kcnk10                    | -4.37 | 0.00  | Ccl3     | -3.04 | 0.00  |
| Cd22                      | -4.34 | 0.00  | Gzmb     | -2.99 | 0.00  |
| Il2ra                     | -4.23 | 0.00  | Il2rb    | -2.91 | 0.00  |
| Ifng                      | -4.14 | 0.00  | Grip1    | -2.91 | 0.01  |
| Il12rb1                   | -4.08 | 0.00  | Tubb2b   | -2.84 | 0.00  |

## Supplementary table 1. Identification of pathways and their top SDE genes in four pairs of comparisons.

**A. Ly6C<sup>high</sup> vs Ly6C<sup>low</sup> (CT); B. Ly6C<sup>high</sup> vs Ly6C<sup>low</sup>(ApoE<sup>-/-</sup>); C. ApoE<sup>-/-</sup> vs CT (Ly6C<sup>high</sup>); D. ApoE<sup>-/-</sup> vs CT (Ly6C<sup>low</sup>).** Top canonical pathways were identified by top-down analysis using GSEA and IPA software. All SDE genes involved in these top pathways are listed. **(a). Top 20 up/down regulated GSEA pathway** (GSEA, |NES|>1). GSEA results showing pathways enriched in the top 20 upregulated or downregulated pathways with the criteria of |NES|>1. The most enriched significant pathways from GSEA using threshold of |NES|>1.5, FDR<0.25, and nominal p value<0.01 are marked using different color (red=up-regulated, blue=down-regulated). **(b). Representative top 40 up/down SDE genes from IPA canonical pathways analysis.** The top 40 up- and down-regulated SDE genes are identified from all IPA pathways in (iii) using the criteria of |Log<sub>2</sub>FC| more than 1 (=two-fold change) and adjusted P value less than 0.01. Molecule type is classified according to the IPA system definition. Molecule type for immunological gene sets is defined based on our previous publication (PMID: 32179051). **Abbreviations:** MC, monocyte; MΦ, macrophage; TREM1, The triggering receptor expressed on myeloid cells 1; GPCRs, G-protein-coupled receptors; PFKFB4, 6-phosphofructo-2-kinase/fructose-2,6-biphosphatase 4; GSEA, Gene Set Enrichment Analysis; ES, enrichment score; NES, Normalized enrichment score.; FDR, false discovery rate. BCR, B cell receptor. **Abbreviation for gene names** refer to list in website <https://www.genecards.org/>.

# Supplementary table 1B. Ly6C<sup>high</sup>(ApoE<sup>-/-</sup>) vs Ly6C<sup>low</sup>(ApoE<sup>-/-</sup>)

## a. Top 20 up/down regulated pathway (GSEA, |NES|>1)

| Pathway name                                                         | NES          | NOM p-val   | FDR q-val   |
|----------------------------------------------------------------------|--------------|-------------|-------------|
| Parkinsons disease                                                   | 1.81         | 0.00        | 0.56        |
| Oxidative phosphorylation                                            | 1.81         | 0.00        | 0.30        |
| <b>Formation of fibrin clot clotting cascade</b>                     | <b>1.79</b>  | <b>0.01</b> | <b>0.24</b> |
| VDR pathway                                                          | 1.74         | 0.01        | 0.34        |
| Endogenous pathway                                                   | 1.71         | 0.00        | 0.39        |
| Synaptic adhesion like molecules                                     | 1.68         | 0.01        | 0.42        |
| LDL clearance                                                        | 1.65         | 0.02        | 0.47        |
| Glyoxylate metabolism and glycine degradation                        | 1.59         | 0.01        | 0.72        |
| IL6 pathway                                                          | 1.58         | 0.02        | 0.70        |
| Drug metabolism cytochrome p450                                      | 1.55         | 0.03        | 0.82        |
| Gcr pathway                                                          | 1.54         | 0.04        | 0.77        |
| Neutrophil degranulation                                             | 1.53         | 0.00        | 0.75        |
| Insulin receptor recycling                                           | 1.52         | 0.02        | 0.75        |
| Pdzs pathway                                                         | 1.50         | 0.04        | 0.84        |
| Notch4 intracellular domain regulates transcription                  | 1.48         | 0.07        | 0.85        |
| Alk1 pathway                                                         | 1.48         | 0.03        | 0.82        |
| Endosomal sorting complex required for transport escrt               | 1.46         | 0.04        | 0.88        |
| Signaling by notch3                                                  | 1.46         | 0.02        | 0.83        |
| Drug metabolism other enzymes                                        | 1.45         | 0.07        | 0.82        |
| Glycosphingolipid metabolism                                         | 1.45         | 0.03        | 0.79        |
| <b>Antigen activates BCR leading to generation of 2nd messengers</b> | <b>-1.71</b> | <b>0.00</b> | <b>0.16</b> |
| <b>Role of LAT2 NTAL lab on calcium mobilization</b>                 | <b>-1.67</b> | <b>0.00</b> | <b>0.20</b> |
| <b>Phase 0 rapid depolarisation</b>                                  | <b>-1.66</b> | <b>0.00</b> | <b>0.16</b> |
| <b>Fceri mediated caplus2 mobilization</b>                           | <b>-1.65</b> | <b>0.00</b> | <b>0.15</b> |
| <b>Primary immunodeficiency</b>                                      | <b>-1.63</b> | <b>0.00</b> | <b>0.22</b> |
| Activation of ampk downstream of nmdars                              | -1.61        | 0.00        | 0.26        |
| Inwardly rectifying kplus channels                                   | -1.60        | 0.00        | 0.26        |
| G protein gated potassium channels                                   | -1.58        | 0.01        | 0.34        |
| NKT pathway                                                          | -1.55        | 0.01        | 0.49        |
| Initial triggering of complement                                     | -1.54        | 0.01        | 0.53        |
| IL12 2pathway                                                        | -1.54        | 0.00        | 0.50        |
| Formation of tubulin folding intermediates by cct tric               | -1.54        | 0.01        | 0.47        |
| Gap junction assembly                                                | -1.54        | 0.01        | 0.43        |
| IL2 stat5 pathway                                                    | -1.54        | 0.01        | 0.43        |
| Ctla4 pathway                                                        | -1.52        | 0.01        | 0.49        |
| Rho gtpases activate iqgaps                                          | -1.52        | 0.01        | 0.51        |
| LIS1 pathway                                                         | -1.52        | 0.02        | 0.48        |
| Potassium channels                                                   | -1.51        | 0.01        | 0.47        |
| Chrebp pathway                                                       | -1.49        | 0.03        | 0.59        |
| Gap junction trafficking and regulation                              | -1.49        | 0.02        | 0.56        |

Up-regulated Down-regulated

## b. SDE gene list of top 40 up/down regulated gene from GSEA pathways (SDE=|LogFC|>1, adj. P<0.01, Identified 146 up regulated and 85 down regulated SDE, only shown top 40 in each groups)

| Up-regulated (40 genes)   |       |       |           |       |       |
|---------------------------|-------|-------|-----------|-------|-------|
| Gene                      | logFC | adj.P | Gene      | logFC | adj.P |
| Clec5a                    | 7.24  | 0.00  | Id1       | 2.97  | 0.00  |
| Vcan                      | 5.93  | 0.00  | Cd33      | 2.92  | 0.00  |
| Cd177                     | 5.78  | 0.00  | Mgam      | 2.86  | 0.01  |
| Mmp8                      | 5.60  | 0.00  | Mgst1     | 2.79  | 0.00  |
| F13a1                     | 5.23  | 0.00  | Acta2     | 2.78  | 0.00  |
| Slpi                      | 4.98  | 0.00  | C3        | 2.78  | 0.00  |
| Ptprf                     | 4.97  | 0.00  | Stbd1     | 2.78  | 0.00  |
| Tarm1                     | 4.43  | 0.00  | Lcn2      | 2.77  | 0.00  |
| Rab44                     | 4.28  | 0.00  | Gria3     | 2.77  | 0.01  |
| Il6                       | 4.27  | 0.00  | Bst2      | 2.75  | 0.00  |
| Prtn3                     | 4.12  | 0.00  | S100a9    | 2.73  | 0.00  |
| Lrg1                      | 3.85  | 0.00  | Svip      | 2.66  | 0.00  |
| Cd93                      | 3.82  | 0.00  | Anxa1     | 2.58  | 0.00  |
| Fos                       | 3.72  | 0.00  | Pnp       | 2.47  | 0.00  |
| Maob                      | 3.71  | 0.00  | Ugt1a5    | 2.43  | 0.00  |
| Bst1                      | 3.62  | 0.00  | F10       | 2.42  | 0.00  |
| Ugt1a1                    | 3.59  | 0.00  | C3ar1     | 2.37  | 0.00  |
| Acvr1                     | 3.57  | 0.00  | Lsr       | 2.36  | 0.00  |
| Iqgap2                    | 3.09  | 0.00  | Eng       | 2.35  | 0.00  |
| Serpinb10                 | 3.05  | 0.00  | Npc2      | 2.34  | 0.00  |
| Down-regulated (40 genes) |       |       |           |       |       |
| Gene                      | logFC | adj.P | Gene      | logFC | adj.P |
| Kcnq4                     | -6.76 | 0.00  | Lta       | -3.95 | 0.00  |
| Zap70                     | -6.44 | 0.00  | Il2rb     | -3.81 | 0.00  |
| Cacna1s                   | -6.26 | 0.00  | Ighd      | -3.79 | 0.00  |
| Kcns1                     | -5.99 | 0.00  | Tjp1      | -3.73 | 0.01  |
| Blk                       | -5.87 | 0.00  | Tubb2b    | -3.69 | 0.00  |
| Cd19                      | -5.48 | 0.00  | Prf1      | -3.68 | 0.00  |
| Fgf13                     | -5.30 | 0.00  | Kcng1     | -3.68 | 0.00  |
| Iglc2                     | -5.08 | 0.00  | Gzmb      | -3.62 | 0.00  |
| Cd79a                     | -5.01 | 0.00  | Il12a     | -3.61 | 0.00  |
| Ighv1-69                  | -4.92 | 0.00  | Gzma      | -3.61 | 0.00  |
| Iglc3                     | -4.89 | 0.00  | Ccr7      | -3.60 | 0.00  |
| Ctla4                     | -4.52 | 0.00  | Scn4a     | -3.59 | 0.00  |
| Blnk                      | -4.38 | 0.00  | Lck       | -3.57 | 0.00  |
| Cdk5r1                    | -4.29 | 0.00  | Icos      | -3.51 | 0.00  |
| Ighv2-5                   | -4.25 | 0.00  | Eomes     | -3.50 | 0.00  |
| Gnb3                      | -4.15 | 0.00  | Myc       | -3.47 | 0.00  |
| Cd79b                     | -4.13 | 0.00  | Tnfrsf13c | -3.44 | 0.00  |
| Ccnd2                     | -4.01 | 0.00  | Ifng      | -3.37 | 0.00  |
| Gabbr1                    | -4.00 | 0.00  | Kcnk13    | -3.34 | 0.00  |
| Cd22                      | -3.99 | 0.00  | Ccl4      | -3.11 | 0.00  |

# Supplementary table 1C. Ly6C<sup>high</sup>(ApoE<sup>-/-</sup>) vs Ly6C<sup>high</sup>(CT)

## A. Top 20 up/down regulated pathway (GSEA, |NES|>1)

| Pathway name                                                                       | NES          | NOM p-val   | FDR q-val   |
|------------------------------------------------------------------------------------|--------------|-------------|-------------|
| Gene and protein expression by jak stat signaling after interleukin 12 stimulation | 1.75         | 0.00        | 0.66        |
| Hes hey pathway                                                                    | 1.71         | 0.00        | 0.59        |
| Protein export                                                                     | 1.60         | 0.01        | 1.00        |
| Arenrf2 pathway                                                                    | 1.60         | 0.02        | 1.00        |
| Insulin processing                                                                 | 1.55         | 0.02        | 1.00        |
| Cell extracellular matrix interactions                                             | 1.54         | 0.02        | 1.00        |
| Shp2 pathway                                                                       | 1.52         | 0.02        | 1.00        |
| G1 phase                                                                           | 1.52         | 0.02        | 1.00        |
| Nos1 pathway                                                                       | 1.52         | 0.02        | 1.00        |
| Histidine metabolism                                                               | 1.51         | 0.04        | 1.00        |
| Proximal tubule bicarbonate reclamation                                            | 1.51         | 0.05        | 1.00        |
| Regulation of the actin cytoskeleton by rho gtpases                                | 1.51         | 0.04        | 1.00        |
| Nfkappab atypical pathway                                                          | 1.49         | 0.06        | 1.00        |
| Phenylalanine metabolism                                                           | 1.48         | 0.05        | 1.00        |
| Tyrosine metabolism                                                                | 1.46         | 0.05        | 1.00        |
| Cysteine and methionine metabolism                                                 | 1.45         | 0.03        | 1.00        |
| Interleukin 6 family signaling                                                     | 1.45         | 0.06        | 1.00        |
| Vegfr2 mediated cell proliferation                                                 | 1.44         | 0.06        | 1.00        |
| Beta alanine metabolism                                                            | 1.44         | 0.07        | 1.00        |
| Vegf pathway                                                                       | 1.43         | 0.06        | 1.00        |
| G2 pathway                                                                         | -1.78        | 0.00        | 0.45        |
| <b>ATRBRCA pathway</b>                                                             | <b>-1.77</b> | <b>0.00</b> | <b>0.25</b> |
| ATM pathway                                                                        | -1.71        | 0.01        | 0.51        |
| Homologous dna pairing and strand exchange                                         | -1.70        | 0.00        | 0.44        |
| Hdr through homologous recombination hrr                                           | -1.67        | 0.00        | 0.49        |
| Resolution of d loop structures through synthesis dependent strand annealing sdsa  | -1.67        | 0.00        | 0.43        |
| Resolution of d loop structures                                                    | -1.66        | 0.01        | 0.43        |
| Bard1 pathway                                                                      | -1.65        | 0.01        | 0.42        |
| Bladder cancer                                                                     | -1.63        | 0.02        | 0.51        |
| Interleukin 7 signaling                                                            | -1.62        | 0.01        | 0.49        |
| Piwi interacting rna pirna biogenesis                                              | -1.61        | 0.01        | 0.53        |
| Il7 pathway                                                                        | -1.59        | 0.02        | 0.58        |
| Aldosterone regulated sodium reabsorption                                          | -1.58        | 0.02        | 0.60        |
| Pentose phosphate pathway                                                          | -1.58        | 0.02        | 0.58        |
| Activation of ampk downstream of nmdars                                            | -1.58        | 0.02        | 0.55        |
| Downstream signaling of activated fgfr3                                            | -1.57        | 0.02        | 0.58        |
| Signaling by bmp                                                                   | -1.55        | 0.03        | 0.61        |
| Rap1 signalling                                                                    | -1.51        | 0.03        | 0.93        |
| Hif1a pathway                                                                      | -1.50        | 0.03        | 0.93        |
| Insulin glucose pathway                                                            | -1.50        | 0.05        | 0.88        |

## b. SDE list of top 40 up/down regulated gene from GSEA pathways (SDEs=|LogFC|>1, adj. P<0.01, Identified 16 up regulated and 28 down regulated SDE) supplement

| Up-regulated (16 genes) |       |       | Down-regulated (28 genes) |       |       |
|-------------------------|-------|-------|---------------------------|-------|-------|
| Gene                    | logFC | adj.P | Gene                      | logFC | adj.P |
| Serpinb2                | 5.08  | 0.00  | Bmpr1a                    | -5.83 | 0.00  |
| Gsta2                   | 4.24  | 0.00  | Rapgef3                   | -5.04 | 0.01  |
| Cd4                     | 3.89  | 0.00  | Fgfr3                     | -4.91 | 0.00  |
| Il4i1                   | 3.64  | 0.00  | Mmp9                      | -4.83 | 0.01  |
| Lif                     | 3.57  | 0.00  | Pik3r3                    | -3.30 | 0.00  |
| Cdkn1c                  | 3.10  | 0.00  | Dapk2                     | -3.27 | 0.00  |
| Ar                      | 2.52  | 0.00  | Plcg1                     | -3.14 | 0.00  |
| Slc30a7                 | 2.50  | 0.00  | Brc1                      | -2.85 | 0.00  |
| Fah                     | 2.02  | 0.00  | Chek1                     | -2.62 | 0.00  |
| Itpr3                   | 2.02  | 0.00  | Tubb2b                    | -2.58 | 0.00  |
| Maff                    | 2.00  | 0.00  | Tdrkh                     | -2.56 | 0.00  |
| Adi1                    | 1.88  | 0.00  | Ccnb1                     | -2.47 | 0.00  |
| Il2ra                   | 1.82  | 0.00  | Slc9a3r2                  | -2.45 | 0.00  |
| Pcsk2                   | 1.54  | 0.01  | Il7r                      | -2.44 | 0.01  |
| Cndp1                   | 1.48  | 0.00  | Aldob                     | -2.26 | 0.00  |
| Srm                     | 1.32  | 0.01  | Prkag3                    | -2.25 | 0.00  |
|                         |       |       | Socs1                     | -2.24 | 0.00  |
|                         |       |       | Aldoc                     | -2.18 | 0.00  |
|                         |       |       | Egln3                     | -1.91 | 0.00  |
|                         |       |       | Fstl1                     | -1.86 | 0.00  |
|                         |       |       | Tbc1d4                    | -1.68 | 0.00  |
|                         |       |       | Tktl1                     | -1.63 | 0.01  |
|                         |       |       | Sfn                       | -1.50 | 0.00  |
|                         |       |       | Akt1                      | -1.45 | 0.00  |
|                         |       |       | Eme1                      | -1.39 | 0.00  |
|                         |       |       | Hsd11b2                   | -1.25 | 0.00  |
|                         |       |       | Fancf                     | -1.13 | 0.00  |
|                         |       |       | Cul2                      | -1.10 | 0.01  |

# Supplementary table 1D. Ly6C<sup>low</sup>(ApoE<sup>-/-</sup>) vs Ly6C<sup>low</sup>(CT)

## a. Top 20 up/down regulated pathway (GSEA, |NES|>1)

| Pathway name                                                                                         | NES          | NOM p-val   | FDR q-val   |
|------------------------------------------------------------------------------------------------------|--------------|-------------|-------------|
| <b>Interferon <math>\alpha/\beta</math> signaling</b>                                                | <b>1.90</b>  | <b>0.00</b> | <b>0.12</b> |
| P53hypoxia pathway                                                                                   | 1.75         | 0.01        | 0.78        |
| Interleukin 20 family signaling                                                                      | 1.71         | 0.02        | 0.95        |
| Mcalpain pathway                                                                                     | 1.70         | 0.00        | 0.72        |
| Creb pathway                                                                                         | 1.68         | 0.01        | 0.77        |
| Integrin a4b1 pathway                                                                                | 1.67         | 0.01        | 0.73        |
| Vip pathway                                                                                          | 1.62         | 0.01        | 0.99        |
| Jak stat signaling pathway                                                                           | 1.62         | 0.00        | 0.88        |
| Antiviral mechanism by ifn stimulated genes                                                          | 1.61         | 0.00        | 0.86        |
| Ptp1b pathway                                                                                        | 1.59         | 0.01        | 0.93        |
| Pi3k plc trk pathway                                                                                 | 1.59         | 0.02        | 0.89        |
| Ppara pathway                                                                                        | 1.56         | 0.02        | 1.00        |
| S1p s1p3 pathway                                                                                     | 1.56         | 0.02        | 1.00        |
| Ret pathway                                                                                          | 1.55         | 0.02        | 0.97        |
| Transcription of G2F targets under negative control by dream complex                                 | 1.54         | 0.03        | 0.98        |
| Activation of irf3 irf7 mediated by tbk1 ikk epsilon                                                 | 1.54         | 0.03        | 0.96        |
| Glutathione metabolism                                                                               | 1.51         | 0.04        | 1.00        |
| S1p meta pathway                                                                                     | 1.50         | 0.04        | 1.00        |
| Downstream signal transduction                                                                       | 1.50         | 0.04        | 1.00        |
| Igf1r pathway                                                                                        | 1.47         | 0.05        | 1.00        |
| Tyrosine metabolism                                                                                  | -1.72        | 0.00        | 0.33        |
| <b>Rho GTPases activate NADPH oxidases</b>                                                           | <b>-1.70</b> | <b>0.00</b> | <b>0.22</b> |
| Toll endogenous pathway                                                                              | -1.64        | 0.01        | 0.58        |
| Histidine metabolism                                                                                 | -1.62        | 0.01        | 0.57        |
| Notch4 intracellular domain regulates transcription                                                  | -1.61        | 0.00        | 0.53        |
| Hedgehog on state                                                                                    | -1.61        | 0.00        | 0.44        |
| Signaling by notch2                                                                                  | -1.61        | 0.00        | 0.39        |
| Plasma lipoprotein clearance                                                                         | -1.60        | 0.00        | 0.40        |
| Phenylalanine metabolism                                                                             | -1.59        | 0.00        | 0.40        |
| Tap63 pathway                                                                                        | -1.59        | 0.00        | 0.36        |
| Tgfb pathway                                                                                         | -1.55        | 0.01        | 0.59        |
| Glycine serine and threonine metabolism                                                              | -1.53        | 0.01        | 0.65        |
| Trafficking of glur2 containing ampa receptors                                                       | -1.53        | 0.02        | 0.68        |
| Negative regulation of met activity                                                                  | -1.52        | 0.02        | 0.63        |
| Tp53 regulates transcription of additional cell cycle genes whose exact role in the p53 pathway rema | -1.52        | 0.02        | 0.65        |
| Notch pathway                                                                                        | -1.52        | 0.01        | 0.61        |
| Her2 pathway                                                                                         | -1.50        | 0.02        | 0.71        |
| Progesterone mediated oocyte maturation                                                              | -1.50        | 0.01        | 0.68        |
| Igf1 pathway                                                                                         | -1.49        | 0.04        | 0.69        |
| Butanoate metabolism                                                                                 | -1.49        | 0.03        | 0.66        |

## b. SDE list of top 40 up/down regulated gene from GSEA pathways (SDEs=|LogFC|>1, adj. P<0.01, Identified 31 up regulated and 48 down regulated SDE, only shown top 40 in down regulated groups)

| Up-Gene | logFC | adj.P | Down-Gene | logFC | adj.P |
|---------|-------|-------|-----------|-------|-------|
| Gab1    | 4.55  | 0.00  | ApoE      | -6.78 | 0.00  |
| Isg20   | 4.05  | 0.00  | Aldh5a1   | -5.64 | 0.00  |
| Gsta2   | 3.86  | 0.00  | Apob      | -5.47 | 0.00  |
| Cntf    | 3.81  | 0.00  | Cables1   | -5.44 | 0.00  |
| Gna14   | 3.70  | 0.00  | Tat       | -5.03 | 0.00  |
| Ifitm1  | 3.06  | 0.00  | Sardh     | -4.77 | 0.00  |
| Il10    | 3.00  | 0.00  | Il6       | -4.71 | 0.00  |
| Rsad2   | 2.90  | 0.00  | S100a9    | -4.44 | 0.00  |
| Il20rb  | 2.74  | 0.00  | Cdc25c    | -4.40 | 0.00  |
| Mpl     | 2.33  | 0.00  | Gli1      | -4.20 | 0.00  |
| Gstm1   | 2.29  | 0.00  | Jag2      | -4.18 | 0.00  |
| Oas2    | 2.16  | 0.00  | Igf1      | -4.09 | 0.00  |
| Isg15   | 2.12  | 0.00  | Vldlr     | -3.99 | 0.00  |
| Oas3    | 2.07  | 0.00  | Bgn       | -3.70 | 0.00  |
| Capns2  | 2.04  | 0.00  | Bud23     | -3.28 | 0.00  |
| Il12a   | 1.89  | 0.00  | Kif7      | -3.26 | 0.00  |
| Kpna2   | 1.84  | 0.00  | Nox1      | -3.09 | 0.00  |
| Gclm    | 1.82  | 0.00  | Mapk13    | -3.00 | 0.00  |
| Eif4e3  | 1.79  | 0.00  | Fos       | -2.99 | 0.00  |
| Gdnf    | 1.71  | 0.00  | Dhh       | -2.93 | 0.00  |
| Tfdp2   | 1.64  | 0.00  | Pik3r3    | -2.92 | 0.00  |
| Cd14    | 1.59  | 0.00  | Mapk10    | -2.67 | 0.00  |
| Nr1h3   | 1.52  | 0.00  | Hal       | -2.65 | 0.00  |
| Egr1    | 1.52  | 0.00  | Lrig1     | -2.37 | 0.00  |
| Ube2l6  | 1.45  | 0.00  | Aldh1b1   | -2.20 | 0.00  |
| Ifi27   | 1.32  | 0.00  | Cubn      | -2.17 | 0.00  |
| Itgb3   | 1.28  | 0.00  | Mfge8     | -2.15 | 0.00  |
| Il15ra  | 1.23  | 0.00  | Hpd       | -2.15 | 0.00  |
| Gna11   | 1.16  | 0.00  | Met       | -2.13 | 0.00  |
| Ccnd1   | 1.06  | 0.00  | Plk1      | -2.12 | 0.00  |
| Gadd45a | 1.03  | 0.00  | Aspa      | -2.08 | 0.00  |
|         |       |       | Sspo      | -1.99 | 0.00  |
|         |       |       | Smad7     | -1.98 | 0.00  |
|         |       |       | Maob      | -1.96 | 0.00  |
|         |       |       | Maoa      | -1.88 | 0.00  |
|         |       |       | Acads     | -1.81 | 0.00  |
|         |       |       | Itgb4     | -1.71 | 0.00  |
|         |       |       | Tab1      | -1.70 | 0.00  |
|         |       |       | Aoc2      | -1.64 | 0.00  |
|         |       |       | Aacs      | -1.52 | 0.00  |

**Sup table 2A. Matched activated SDE TF with SDE gene in Ly6C<sup>high</sup>(CT) vs Ly6C<sup>low</sup>(CT)**  
**(IPA, upstream analysis, |z-score|>2, P<0.01)**

| TF     | LogFC | State     | z-score | p-value | Activated Targeting SDE genes                                                                                                                                                                                                                                                                                                                                                                                                                                                                                                                                                                                                                                                                                                                                                                                                                                                                                                                                                                                                                                                                                                                                                                                                                                                                                                                                                                                                            |
|--------|-------|-----------|---------|---------|------------------------------------------------------------------------------------------------------------------------------------------------------------------------------------------------------------------------------------------------------------------------------------------------------------------------------------------------------------------------------------------------------------------------------------------------------------------------------------------------------------------------------------------------------------------------------------------------------------------------------------------------------------------------------------------------------------------------------------------------------------------------------------------------------------------------------------------------------------------------------------------------------------------------------------------------------------------------------------------------------------------------------------------------------------------------------------------------------------------------------------------------------------------------------------------------------------------------------------------------------------------------------------------------------------------------------------------------------------------------------------------------------------------------------------------|
| PAX5   | -5.18 | Inhibited | -2.81   | 0.00    | BCL2,BLK,BLNK,CCND1,CD19,CD22,CD72,CD79A,CSF1R,CSF2RA,CTNNA1,FCER2,FLT3,FN1,G6PD,HK2,HK3,INSR,JCHAIN,MET,MMP2,PGAM1,POU2AF1,PYGL,SLC2A3,TNFRSF13C,VIM<br>ABCA1,ABCA7,ABCC4,ACOD1,ACSS1,ACTB,ACVR1,AHR,AKAP1,AKAP12,ALOX5,ANXA4,ANXA5,APP,AR,ATP13A2,AXL,BCL2,BCL2A1,BCR,CAMK2N1,CAPN2,CAST,Ccl6,CCNA2,CCNB2,CCND1,CCND2,CCNE1,CD151,CD19,CD274,CD44,CD69,CDC25B,CDH1,CDKN1A,CEBPA,CEBPD,CEBPE,CHRN1,CHST15,CNP,COBLL1,COL15A1,CSF1R,CSTB,CTDSP1,CTDSP1,CTNNA1,CTSV,CXCL10,CYFIP2,CYTH2,DBI,DB2,DDX11,DHFR,DKC1,DUSP1,DUSP2,DUSP5,DUSP6,E2F2,EBF1,ECM1,EIF2B4,EMP1,EOMES,EPCA,M,EZH1,F2R,FABP4,FABP5,FAS,FASLG,Flg,FN1,FOS,G6PD,GADD45G,GATA6,GBP3,GGH,GLUD1,GLUL,GPC1,GSR,H2AZ1,HIVEP2,HK2,HLA-A,HMOX1,HMOX2,HSD11B2,HSP90AA1,ID1,IDH1,IER3,IFI16,IFI44,IFIH1,IFIT2,IFIT3,Igha,IL5RA,IQGAP2,IRF7,ITGA1,ITGAM,ITGAX,ITGB5,ITM2B,JAG2,JUN,KLF10,LAMP1,LAMP2,LDHB,LGR5,LXN,Ly6a,LyZ,MAPK3,MBP,MCM5,MCM6,MCM7,MITF,MTHFD1,MTHFR,MYBBP1A,MYC,MYD88,NCKAP1,NDRG1,NFATC3,NIBAN1,NME2,NOP58,NRP1,OAS1,OASL,Oasl2,OT,AT,PAX5,Pdlim3,PFKFB1,PFKM,PGAM1,PIAS4,PKM,PLAUR,PLSCR1,PML,POLD1,POLDIP3,POLR2D,POU4F1,PPAT,PPL,PRDX2,PRKCA,Pr12c2,RARA,RARG,RBBP7,RHOB,SAT1,SCARB1,SECL,SDCBP,SEM A4A,SFXN1,SLC16A1,SLC22A4,SLC25A5,SLC2A3,SMS,SOX5,SQOR,SRM,STAT1,STMN1,SUCLA2,TAT,TCF3,TERT,TES,TESPA1,TF,TFRC,TGFB1,Tgtp1/Tgtp2,TIAM1,TIMM10B,TKT,TLN1,TLR7,TNFRSF19,TNFRSF8,TNS3,TPD52,TSPO,TWSG1,TYMS,UGT1A6,USP18,VAMP3,VARS,VIM,VPS72,WNT5A,ZFP36L1 |
| MYC    | -4.22 | Inhibited | -3.54   | 0.00    | ALOX5,BCL2,BLNK,CAV2,CD38,CD68,CITED2,DOCK4,FN1,IFIT3,IRF7,MAN1C1,MYC,PROS1,RASSF4,RNF213,RTP4,TNS3                                                                                                                                                                                                                                                                                                                                                                                                                                                                                                                                                                                                                                                                                                                                                                                                                                                                                                                                                                                                                                                                                                                                                                                                                                                                                                                                      |
| IKZF3  | -4.21 | Inhibited | -2.75   | 0.00    | CCL3L3,CCL4,CD38,CX3CR1,CXCR3,CXCR5,EOMES,FAM89B,FASLG,GZMA,Gzmb,HLX,IFNG,IL12RB1,IL12RB2,IL18RAP,IL2RB,IL6R,KLRD1,KLRG1,Klrk1,NKG7,PRF1,STAT4,TBX21,ZEB2                                                                                                                                                                                                                                                                                                                                                                                                                                                                                                                                                                                                                                                                                                                                                                                                                                                                                                                                                                                                                                                                                                                                                                                                                                                                                |
| TBX21  | -3.40 | Inhibited | -2.82   | 0.00    | ACTA2,ANXA1,APLNR,DNAJC15,EOMES,FASLG,FREM1,GZMA,IFNG,IL2RB,ITGA2,Klra7,NRP2,PRF1,RG52,RND3,TDRD7,TGFB1                                                                                                                                                                                                                                                                                                                                                                                                                                                                                                                                                                                                                                                                                                                                                                                                                                                                                                                                                                                                                                                                                                                                                                                                                                                                                                                                  |
| EOMES  | -3.33 | Inhibited | -2.74   | 0-40    | ANXA5,ATF3,CD74,CXCL10,DAB2IP,DMD,DUSP10,EEF2K,EGR3,ETS1,F2R,Gm2016,GRN,IFIH1,IFIT3,IFITM3,IL6R,MRTFB,MTHFR,MYC,NFIL3,OAS1,OAS3,P2RX7,PLSCR1,POLE,PPARG,PRKCA,PTAFR,RAC1,RPA1,RRXA,STAT1,STAT5A,TCF3,TGFB3,TNFRSF1A,TNFRSF21                                                                                                                                                                                                                                                                                                                                                                                                                                                                                                                                                                                                                                                                                                                                                                                                                                                                                                                                                                                                                                                                                                                                                                                                             |
| SP110  | -1.65 | Inhibited | -2.30   | 0.00    | AGR1,BLNK,Bst2,CA2,CALHM6,CMPK2,CXCL10,DHX58,EMB,EPST11,GBP3,GLUL,HERC6,IFI271a/IFI271b,IFI44,IFI47,IFIH1,IFIT1B,IFIT2,IFIT3,IFNGR1,IFNGR2,Igtp,IRF7,IRGM,Irgm1,ISG15,LGALS3,LGALS3BP,Ly6a,Ms4a4b,OAS1,OASL,PARP12,PCLAF,PHF11,PLAC8,PRKCK,PRPS2,RTP4,SAMHD1,STAT1,STAT2,TAP1,TGFB1,Tgtp1/Tgtp2,TLR2,TRAFD1,TRIM6-TRIM34,USP18                                                                                                                                                                                                                                                                                                                                                                                                                                                                                                                                                                                                                                                                                                                                                                                                                                                                                                                                                                                                                                                                                                           |
| TRIM24 | -1.03 | Inhibited | -4.86   | 0.00    | BAK1,CCL4,CCL5,CDKN1A,CMPK2,CXCL10,DHX58,IFI44,IFIH1,IFIT2,IFIT3,IFITM3,IRF5,IRF7,ISG15,MYC,NAMPT,OAS1,OAS2,OASL,Oasl2,PARP12,PLSCR1,PRKRA,RAC1,SP110,STAT1,STAT2,TGFB1,TMPO,USP8                                                                                                                                                                                                                                                                                                                                                                                                                                                                                                                                                                                                                                                                                                                                                                                                                                                                                                                                                                                                                                                                                                                                                                                                                                                        |
| IRF5   | 1.09  | Activated | 2.93    | 0.00    | ABCA1,ACOD1,ALPK1,APOBEC3B,APOL6,AXL,BAD,BATF2,BTNL9,C1R,C3,CALHM6,Ccl2,CCL3L3,CCL4,CCL5,CCND1,CCND2,CCNE1,CCR6,CCR7,CD14,CD274,CDKN1A,CEBPD,CFB,Chil3/Chil4,CLIC5,CMK2,CSF3R,CTSS,CX3CR1,CXCL10,CXCR3,EIF2AK2,EPST11,FAS,FASLG,FCER1G,FCGR1A,FOS,FURIN,GBP3,GBP6,Gzmb,HERC6,HLA-DQA11,HLA-                                                                                                                                                                                                                                                                                                                                                                                                                                                                                                                                                                                                                                                                                                                                                                                                                                                                                                                                                                                                                                                                                                                                              |
| STAT1  | 1.27  | Activated | 3.01    | 0.00    | DRB5,IFI16,IFI30,IFI44,IFI47,IFIH1,IFIT1B,IFIT2,IFIT3,IFITM2,IFITM3,IFNG,Igtp,IL12RB2,IL15,IRF5,IRF7,Irgm1,ISG15,ITGAX,JUN,Klrk1,Ly6a,MAFA,Mx1,Mx2,MYC,NFE2,OAS1,OAS2,OAS3,OASL,Oasl2,PDCC1L,G2,PLSCR1,PPARG,PRF1,RNF213,RTP4,SAMHD1,Serpina3g,SLAMF8,SLC8A1,Sifn1,SLFN12,SLFN13,SLFN5,SLFN5,SMAGP,SOAT1,SORT1,SP110,STAT1,STAT2,TAP1,TBX21,Tgtp1/Tgtp2,TLR8,TRAFD1,USP18,Wfdc17,XAF1,ZBP1                                                                                                                                                                                                                                                                                                                                                                                                                                                                                                                                                                                                                                                                                                                                                                                                                                                                                                                                                                                                                                               |
| SPI1   | 1.41  | Activated | 3.74    | 0.00    | Acp5,ACTA2,ACTB,BCL11A,BCL7A,BLNK,CCL4,CCNA2,CCNB2,CCND1,CCND2,CCR6,CCR7,CD14,CD19,CD68,CD72,CD79A,CD79B,CDKN1A,CEBPA,CEBPE,CHIT1,CMPK2,CSF1R,CSF2RA,CSF2RB,CSF3R,CTSS,CXCL10,CYBB,DUSP6,E2F2,EBF1,ETS2,FCER1G,FES,FOS,Foxp1,FUT7,GATA1,HDAC7,HK3,HS PA8,IFI44,IFIT1B,IFIT2,IFIT3,IFITM3,Igfv2,IL1RN,IL2RA,IMP4,IRF7,ISG15,ITGA5,ITGAM,JUN,Klra7,LILRB3,LMO2,LyZ,MBP,MMP2,MS4A1,MYB,MYC,NCF2,OASL,OPRM1,P2RY10,PARP12,PML,PRTN3,PTPN6,SP110,SPI1,TFEC,TLR2,TREM1,USP18,VIM                                                                                                                                                                                                                                                                                                                                                                                                                                                                                                                                                                                                                                                                                                                                                                                                                                                                                                                                                               |
| KLF10  | 1.48  | Activated | 2.21    | 0.04    | BCL2,CCND1,CDKN1A,TBX21,TGFB1                                                                                                                                                                                                                                                                                                                                                                                                                                                                                                                                                                                                                                                                                                                                                                                                                                                                                                                                                                                                                                                                                                                                                                                                                                                                                                                                                                                                            |
| TRPS1  | 1.52  | Activated | 2.73    | 0-07    | ACSL1,CCNA2,CCNB2,ENPP1,FN1,GPR141,KIF11,MMP2,PACIN1,RAMP1,SPC25                                                                                                                                                                                                                                                                                                                                                                                                                                                                                                                                                                                                                                                                                                                                                                                                                                                                                                                                                                                                                                                                                                                                                                                                                                                                                                                                                                         |
| STAT2  | 1.80  | Activated | 2.69    | 0.00    | BCL2,Ccl2,CCL5,CXCL10,GBP6,IFI47,IFIT1B,IFIT2,IFIT3,IFITM2,IFNG,IRF5,IRF7,ISG15,Mx1,OAS1,OAS2,Oasl2,RTP4,STAT1,USP18,ZBP1                                                                                                                                                                                                                                                                                                                                                                                                                                                                                                                                                                                                                                                                                                                                                                                                                                                                                                                                                                                                                                                                                                                                                                                                                                                                                                                |
| CEBPE  | 2.70  | Activated | 2.52    | 0.00    | ALOX5AP,BCL2,Ccl9,CCND2,CCNE1,CD14,CLEC10A,CSF1R,CSF3R,CTSV,GATA1,IL1RN,IL5RA,ITGAM,LyZ,MBP,MMP2,MMP8,MYC,Ngp,RNASE2                                                                                                                                                                                                                                                                                                                                                                                                                                                                                                                                                                                                                                                                                                                                                                                                                                                                                                                                                                                                                                                                                                                                                                                                                                                                                                                     |
| CEBPD  | 2.71  | Activated | 2.63    | 0.00    | ALOX5AP,BCL2A1,C3,Ccl2,CCL3L3,CCNB2,CCND1,CD14,CDKN1A,CEBPD,CSF1R,CSF3R,CTSV,FABP4,FOS,HP,ITGAM,ITGAX,MBP,MITF,MMP8,MYC,PPARG,PRTN3,PTAFR,TLR8,XBP1                                                                                                                                                                                                                                                                                                                                                                                                                                                                                                                                                                                                                                                                                                                                                                                                                                                                                                                                                                                                                                                                                                                                                                                                                                                                                      |
| IRF7   | 2.86  | Activated | 5.79    | 0.00    | BC147527,CALHM6,Ccl2,CCL5,CD69,CMPK2,CTLA4,CXCL10,DAXX,DHX58,FCGR1A,GBP3,IFI16,IFI44,IFI47,IFIH1,IFIT1B,IFIT2,IFIT3,IFITM2,IFITM3,Igtp,IL15,IL27,IL411,IRF5,IRF7,IRGM,Irgm1,ISG15,ITGAM,ITGAX,LILRA5,Ly6a,Ms4a4b,Mx1,Mx2,NAMPT,OAS1,OAS2,OAS3,OASL,Oasl2,PARP12,PARP14,PELI1,PHF11,PLAC8,PLSCR1,RTP4,SAP30,Sifn1,STAT1,STAT2,TAP1,TDRD7,TLR8,TMPO,TRAF1,TREX1,Trim30a/Trim30d,USP18,USP8,XAF1,ZBP1                                                                                                                                                                                                                                                                                                                                                                                                                                                                                                                                                                                                                                                                                                                                                                                                                                                                                                                                                                                                                                       |
| CEBPA  | 3.10  | Activated | 3.14    | 0.00    | Abcb1b,ACOD1,ACSL1,AKAP12,ALOX5AP,ANXA1,APLNR,ARL4C,BCL2,BCL2A1,C3,CA2,CCL4,Ccl9,CCNA2,CCNB2,CCND1,CCND2,CD14,CD19,CD7,CDH1,CDKN1A,CEBPA,CEBPD,CEBPE,CSF1R,CSF2RA,CSF3R,CTNNA1,DGAT2,DHFR,EBF1,EPHX1,EXTL2,F8,FABP4,FCGR1A,Flg,FLT1,FOS,G0S2,GATA6,GGH,GLIPR1,GLRX,HMOX1,HP,HSD11B1,ID1,IER3,IKZF3,IL1RN,IL6R,INSR,ISG15,ITGAM,ITGAX,ITGB5,JUN,JUNB,KLRC1,LCK,LPL,Ly6a,LYL1,MALT1,MAPKAPK2,MMP8,MSI2,MYC,NFIL3,NRP1,OAS2,OXTR,PA X5,PGD,PLIN2,PLOD2,PLXND1,PPARG,PPL,PRTN3,PTAFR,RAB31,RG52,S100A9,SCD,SERPINI1,SMP DL3A,SPI1,SPINT2,TBXAS1,TIAM1,TNFRSF19,TNFRSF1A,VCAN,VCL,ZNF296                                                                                                                                                                                                                                                                                                                                                                                                                                                                                                                                                                                                                                                                                                                                                                                                                                                      |
| IFI16  | 4.65  | Activated | 2.10    | 0.00    | BAD,CCL4,CCL5,CCND1,CD81,CDKN1A,CSF3R,CXCL10,DHFR,E2F2,IFI16,IL1RN,IL2RB,ISG15,LDLR,LPL,MGST1,Mx1,OAS1,STAT2                                                                                                                                                                                                                                                                                                                                                                                                                                                                                                                                                                                                                                                                                                                                                                                                                                                                                                                                                                                                                                                                                                                                                                                                                                                                                                                             |

Sup table 2B. SDE transcription regulator match with SDE gene in Ly6C<sup>high</sup> vs Ly6C<sup>low</sup> in ApoE<sup>-/-</sup> mice

| TFs    | LogFC | Z-score | P-value | Target Molecules in Dataset                                                                                                                                                                                                                                                                                                                                                                                                                                                                                                                                                                                                                                                                                                                                                                                                                                                                                                                                                                                                                                                                                                                                                                                                                                                                                                                                                                                                                                                |
|--------|-------|---------|---------|----------------------------------------------------------------------------------------------------------------------------------------------------------------------------------------------------------------------------------------------------------------------------------------------------------------------------------------------------------------------------------------------------------------------------------------------------------------------------------------------------------------------------------------------------------------------------------------------------------------------------------------------------------------------------------------------------------------------------------------------------------------------------------------------------------------------------------------------------------------------------------------------------------------------------------------------------------------------------------------------------------------------------------------------------------------------------------------------------------------------------------------------------------------------------------------------------------------------------------------------------------------------------------------------------------------------------------------------------------------------------------------------------------------------------------------------------------------------------|
| Eomes  | -3.50 | -2.98   | 0.03    | ACTA2,ADM,ANXA1,APLNR,CAP2,EOMES,FASLG,FAT3,GZMA,IFNG,IL2RB,ITGA2,Klra7,NRP2,POU5F1,PRF1,RND3,TBX6,TDRD7,TGFBI,TNFSF10,ZNF521<br>ABCA7,ABCC3,ABCC4,ACOD1,ACSS1,ACTN1,ACVR1,ADK,ADM,AFP,AHR,ALDH18A1,ANXA4,ANXA5,APP,AR,ARG1,ASCL2,AURKB,AXL,BCKDHB,BCL2,BCL2A1,BCR,BMPR1A,BRCA1,C12orf49,CAMK2N1,CAPN2,Ccl6,CCNB1,CCNB2,CCND1,CCND2,CCNE1,CD19,CD274,CDC25B,CDCA7,CDH1,CDKN1A,CEBPA,CEBPD,CHEK1,CHRN1,CHST15,CIAO2A,CNP,COBLL1,COL14A1,COL4A2,COMMD3BMI1,CPT1A,Crisp1/Crisp3,CRYAB,CSTB,CTDSPL,CTSV,CXCL10,CYFIP2,DBI,DDX11,DKC1,DUSP2,DUSP5,DUSP6,DUSP7,E2F1,E2F2,Ear2,EBF1,EBI3,EGR1,EGR2,EIF4EBP1,EMP1,ENO1,EOMES,EPCAM,F2R,FABP4,FABP5,FASLG,Flg,FN1,FOS,FOXM1,FSTL1,G6PD,GADD45G,GAMT,Gar1,GATA6,GBP3,GDF3,GGH,GLUD1,GLUL,GPC1,GSR,H2AZ1,HES1,HIVP2,HK2,HLAA,HMOX2,HSPB1,ID1,IDH1,IDH2,IER3,IFI16,IFI44,IFIH1,IFIT1,IFIT2,IFIT3,Igha,IL10,IL17RB,IL5RA,IMPA2,IMPACT,IQGAP2,IRF7,ITGA1,ITGA3,ITGAX,JUN,KHDC3L,LAMP1,LAMP2,LDHB,Ly6a,LYZ,MAPK3,MCM6,MCM7,MITF,MRC1,MSH2,MTBP,MTHFD1,MTHFR,MYC,MYD88,MYLPF,NCAM1,NDRG1,NFAT5,NFATC3,NIBAN1,NME2,NRP1,OAS1,OASL,Oas2,PAK1,PAX5,PCDH18,Pdlim3,PECAM1,PFKFB1,PGK1,PIAS3,PLAU,PLP1,PLSCR1,POLD1,POU5F1,PAT,PPL,PRDX4,PRKCA,PYCR1,RARA,RARG,RBBP7,RHOB,RRM2,SARDH,SCARB1,SECEL,SEMA4A,SHMT2,SLC16A1,SLC22A4,SLC25A5,SMN1/SMN2,SMS,SOX5,SPN,SPP1,SQOR,SRM,STMN1,TAT,TCF3,Tcf7,TERT,TES,TESPA1,TF,TFRC,TGM1,THOP1,TIAM1,TIMM10B,TNFRSF19,TNFRSF8,TNFSF10,TNS3,TPD52,TSPO,TWSG1,UGT1A1,UGT1A3,UGT1A6,USP18,VEGFC,VI<br>M,ZFP36L1 |
| Myc    | -3.47 | -2.57   | 0.00    | BCL2,BLK,BLNK,CCND1,CD19,CD22,CD72,CD79A,FCER2,FN1,G6PD,HK2,JCHAIN,MET,POU2AF1,PTPRF,PYGL,SDC1,TNFRSF13C,VIM<br>CCL3L3,CCL4,CD38,CXCR3,CXCR5,EOMES,FAM89B,FASLG,GATA3,GZMA,Gzmb,HLX,ICOS,IFNG,IL12RB1,IL12RB2,IL18RAP,IL2RB,IL6R,IL7R,ITGAE,ITK,KLRD1,KLRG1,Klra1,KNKG7,PRF1,PTGDR2,SELL,SPP1,STAT4,TBX21,Tcf7                                                                                                                                                                                                                                                                                                                                                                                                                                                                                                                                                                                                                                                                                                                                                                                                                                                                                                                                                                                                                                                                                                                                                             |
| Pax5   | -3.45 | -3.06   | 0.00    | BCL2,CCNB1,CCNB2,CCND1,CDC25B,CEBPA,CLTA,FASLG,FOXM1,GATA2,ID1,IFNG,IGFBP5,MYBL2,MYC,TFEC,TOP2A<br>ACVR1,AFP,AHR,B3GNT7,BCL2,BCL2A1,BMPR1A,BNIP3L,BRCA1,CARD6,CCND1,CDH1,CDKN1A,CHST15,COBLL1,CXCL10,DAPK1,DDFA,DUSP5,EOMES,EPCAM,FASLG,Flg,FUT4,GADD45G,GATA2,GATA6,GBP3,GDF3,HOPX,IER5L,IL6,KHDC3L,LOXL1,LTA,MYBL2,MYC,NCAM1,NRP1,Oas2,PCDH18,PCGF6,Pdlim3,PECAM1,PHC1,PMEDA1,POLE4,POU5F1,PPL,RARA,SIRPA,SPP1,TDRD7,TF,TGM1,TNFRSF19,TNFRSF1A,TNFRSF21,TNFRSF9,TNFSF10,TNFSF8,TRAF4,TWSG1,USP18,VIM,ZEB1                                                                                                                                                                                                                                                                                                                                                                                                                                                                                                                                                                                                                                                                                                                                                                                                                                                                                                                                                                |
| Tbx21  | -2.96 | -2.53   | 0.00    | CCL5,CDKN1A,CXCL10,Cxcl9,GADD45G,GBP3,GPX3,HGF,IFI44,IFIT2,IRF7,Mx2,OAS2,OAS3,PARGC1A                                                                                                                                                                                                                                                                                                                                                                                                                                                                                                                                                                                                                                                                                                                                                                                                                                                                                                                                                                                                                                                                                                                                                                                                                                                                                                                                                                                      |
| Mybl2  | 1.57  | -2.17   | 0.00    | BCL2,CCL3L3,CCL4,DTX1,EOMES,FASLG,FYN,GATA3,GZMA,IFNG,IL2RA,IL7R,Klra7,LEF1,SOX12,TBX21,TNFRSF19,TOX<br>CCL4,CCL5,CDKN1A,CMPK2,CXCL10,DAPK2,DHX58,FOXO1,IFI44,IFIH1,IFIT1,IFIT2,IFIT3,IFITM3,IL12A,IL6,IRF5,IRF7,ISG15,MYC,NAMPT,OAS1,OAS2,OASL,Oas2,PARP12,PLSCR1,PRKRA,SP110,TMPO,TNFSF10                                                                                                                                                                                                                                                                                                                                                                                                                                                                                                                                                                                                                                                                                                                                                                                                                                                                                                                                                                                                                                                                                                                                                                                |
| Pou5f1 | 1.62  | -2.18   | 0.00    | ALPL,AURKB,CCNB2,CENPF,ENPP1,ENPP6,FN1,FOXM1,GALNT3,GPR141,KIF11,PACSIN1,RAMP1,SERPINB2,TOP2A,ZEB1<br>ALOX5AP,BCL2A1,BRCA1,C3,Ccl2,CCL3L3,CCNB1,CCNB2,CCND1,CDKN1A,CEBPD,CSF3R,CTSV,FABP4,FOS,HGF,HP,IGFBP5,IL10,IL6,ITGAX,MITF,MMP8,MYC,PPARG,PRTN3,PTAFR,TLR8,VEGFC,XBP1                                                                                                                                                                                                                                                                                                                                                                                                                                                                                                                                                                                                                                                                                                                                                                                                                                                                                                                                                                                                                                                                                                                                                                                                 |
| Prdm16 | 1.80  | -2.33   | 0.00    | LJLJL;Q16IKLN NJ MHJ<br>ABC1,Abcb1b,ACOD1,AKR1C3,ALOX5AP,ANPEP,ANXA1,APLNR,ARG1,ARG2,ARL4C,ASL,BCL2,BCL2A1,C3,C3AR1,CCL4,Ccl9,CCNB2,CCND1,CCND2,CD19,CDH1,CDKN1A,CEBPA,CEBPD,CPT1A,CSF3R,CTSK,CYP11A1,DGAT2,E2F1,EBF1,EFNB2,EGR2,EPHX1,EXTL2,FABP4,FCGR1A,Flg,FLT1,FOS,FOXM1,FOXO1,FXR2,G0S2,GATA2,GATA6,GGH,GLRX,HGF,HP,HSD11B1,ICAM2,ID1,IER3,IKZF3,IL10,IL1RN,IL6,IL6R,ISG15,ITGAX,JUN,KLRC1,LCK,LCN2,LPL,Ly6a,MAPKAPK2,MMP8,MSI2,MYBL2,MYC,NFIL3,NR4A2,NRP1,OAS2,OLR1,Orm1                                                                                                                                                                                                                                                                                                                                                                                                                                                                                                                                                                                                                                                                                                                                                                                                                                                                                                                                                                                             |
| Tcf7   | -1.83 | 2.60    | 0.00    | PAX5,PGD,PLIN2,PLOD2,PLXND1,PPARG,PPARGC1A,PPL,PRTN3,PTAFR,RAB31,RARRES2,RIN1,S100A8,S100A9,SCD,SERPIN2,SERPINF1,SERPINI1,SMPDL3A,SPINT2,SPP1,STAR,TBXAS1,THRA,TIAM1,TNFRSF19,TNFRSF1A,TNFSF10,TRAF4,VCAN,VCL,ZBTB48,ZNF296                                                                                                                                                                                                                                                                                                                                                                                                                                                                                                                                                                                                                                                                                                                                                                                                                                                                                                                                                                                                                                                                                                                                                                                                                                                |
| Irf5   | 1.02  | 2.98    | 0.00    |                                                                                                                                                                                                                                                                                                                                                                                                                                                                                                                                                                                                                                                                                                                                                                                                                                                                                                                                                                                                                                                                                                                                                                                                                                                                                                                                                                                                                                                                            |
| Trps1  | 1.06  | 3.01    | 0.00    |                                                                                                                                                                                                                                                                                                                                                                                                                                                                                                                                                                                                                                                                                                                                                                                                                                                                                                                                                                                                                                                                                                                                                                                                                                                                                                                                                                                                                                                                            |
| Cebpd  | 2.06  | 2.28    | 0.00    |                                                                                                                                                                                                                                                                                                                                                                                                                                                                                                                                                                                                                                                                                                                                                                                                                                                                                                                                                                                                                                                                                                                                                                                                                                                                                                                                                                                                                                                                            |
| Irf7   | 2.16  | 4.87    | 0.00    |                                                                                                                                                                                                                                                                                                                                                                                                                                                                                                                                                                                                                                                                                                                                                                                                                                                                                                                                                                                                                                                                                                                                                                                                                                                                                                                                                                                                                                                                            |
| Cebpa  | 2.67  | 2.55    | 0.00    |                                                                                                                                                                                                                                                                                                                                                                                                                                                                                                                                                                                                                                                                                                                                                                                                                                                                                                                                                                                                                                                                                                                                                                                                                                                                                                                                                                                                                                                                            |



# Supplementary table 3

**Sup. table 3. Reported MC generation TF (literature screening)**

| TFs                 | Gene Symbol | Gene full name                                                  | PMID     | Gene ID |        |
|---------------------|-------------|-----------------------------------------------------------------|----------|---------|--------|
|                     |             |                                                                 |          | Hs      | Mm     |
| IRF8                | Irf8        | interferon regulatory factor 8                                  | 23319570 | 3394    | 15900  |
| PU.1                | Spi1        | spleen focus forming virus (SFFV) proviral integration oncogene | 9687512  | 6688    | 20375  |
| FLI1                | Fli1        | Friend leukemia integration 1                                   | 15367440 | 2313    | 30619  |
| KLF4                | Klf4        | Kruppel like factor 4                                           | 18390749 | 9314    | 16600  |
| KLF2                | Klf2        | Kruppel like factor 2                                           | 28379391 | 10365   | 16598  |
| NR4A1               | Nr4a1       | nuclear receptor subfamily 4 group A member 1                   | 21725321 | 3164    | 15370  |
| C/EBP $\beta$       | Cebpb       | CCAAT/enhancer binding protein (C/EBP)                          | 28514690 | 1051    | 12608  |
| TET3                | Tet3        | Ten-Eleven-Translocation-3                                      | 30575719 | 00424   | 194388 |
| c-Jun               | Jun         | jun proto-oncogene                                              | 23525665 | 3725    | 16476  |
| JunB                | Junb        | jun B proto-oncogene                                            | 23525665 | 3726    | 16477  |
| STAT1               | Stat1       | signal transducer and activator of transcription 1              | 23525665 | 6772    | 20846  |
| STAT3               | Stat3       | signal transducer and activator of transcription 3              | 23525665 | 6774    | 20848  |
| VDR                 | Vdr         | vitamin D receptor                                              | 23525665 | 7421    | 22337  |
| IRF1                | Irf1        | interferon regulatory factor 1                                  | 23525665 | 3659    | 16362  |
| IRF4                | Irf4        | interferon regulatory factor 4                                  | 23525665 | 3662    | 16364  |
| C/EBP $\epsilon$    | Cebpe       | CCAAT/enhancer binding protein (C/EBP), epsilon                 | 23525665 | 1053    | 110794 |
| C/EBP $\alpha$ -p42 | Cebpa       | CCAAT/enhancer binding protein (C/EBP), alpha                   | 9012825  | 1050    | 12606  |
| GATA-2              | Gata2       | GATA binding protein 2                                          | 25707267 | 2624    | 14461  |
| RUNX1               | Runx1       | runt related transcription factor 1                             | 17994017 | 861     | 12394  |
| TCF19               | Tcf19       | transcription factor 19                                         | 27386937 | 6941    | 106795 |
| POU5F1              | Pou5f1      | POU domain, class 5, transcription factor 1                     | 27386937 | 5460    | 18999  |
